# Supplementary material for: Discordant pathologic diagnoses of myelodysplastic neoplasms and their implications for registries and therapies
Source: PubMed Central journal article supplement — Blood Adv. 2023 Aug 10;7(20):6120–9. doi: 10.1182/bloodadvances.2023010061 (PMC10582385; doi:10.1182/bloodadvances.2023010061), 2023-08-10
Supplement: BLOODA_ADV-2023-010061-mmc1.pdf [file BLOODA_ADV-2023-010061-mmc1.pdf]

## Supplemental Tables

Table S1. Comparison of participants enrolled at the time of diagnosis versus those enrolled within 12 months of diagnosis.

|                                  |                           | Enrolled at Diagnosis<br>(N = 864) | Enrolled within 12 months of<br>Diagnosis (N = 54) |
|----------------------------------|---------------------------|------------------------------------|----------------------------------------------------|
| <b>Gender</b>                    | Female, N (%)             | 335 (39%)                          | 20 (37%)                                           |
|                                  | Male, N (%)               | 529 (61%)                          | 34 (63%)                                           |
| <b>Age</b>                       | Mean (SD)                 | 70.0 (12.2)                        | 67.2 (10.2)                                        |
| <b>Race</b>                      | Black or African American | 47 (5%)                            | 1 (2%)                                             |
|                                  | White                     | 779 (90%)                          | 50 (93%)                                           |
|                                  | Other                     | 25 (3%)                            | 1 (2%)                                             |
|                                  | Unknown/Not Reported      | 13 (2%)                            | 2 (4%)                                             |
| <b>Ethnicity</b>                 | Hispanic or Latino        | 23 (3%)                            | 1 (2%)                                             |
|                                  | Not Hispanic or Latino    | 827 (96%)                          | 51 (94%)                                           |
|                                  | Unknown/Not Reported      | 14 (2%)                            | 2 (4%)                                             |
| <b>Final Study<br/>Diagnosis</b> | AML <30% blasts*          | 14 (2%)                            | 1 (2%)                                             |
|                                  | ICUS                      | 48 (6%)                            | 1 (2%)                                             |
|                                  | MDS                       | 226 (26%)                          | 40 (74%)                                           |
|                                  | MDS/MPN overlap           | 43 (5%)                            | 2 (4%)                                             |
|                                  | Other AML                 | 36 (4%)                            | 2 (4%)                                             |
|                                  | Other Malignancy          | 90 (10%)                           | 3 (6%)                                             |
|                                  | Other                     | 407 (47%)                          | 5 (9%)                                             |

\*AML with <30% blasts without core binding factor or acute promyelocytic leukemia.

**Table S2. Disease subclass diagnosis for cases that were classified as Other or with a subclass that did not indicate a myeloid malignancy (N=789). This table is published elsewhere [12] and pertains to a larger sample of the MDS Natural History Study than was included in this paper and has been annotated here to provide additional details of the diagnosis categories.**

| Diagnosis                                                                     | N=789 |      |
|-------------------------------------------------------------------------------|-------|------|
|                                                                               | N     | %    |
| Normal marrow                                                                 | 159   | 20.2 |
| Cytopenias NOS                                                                | 124   | 15.7 |
| Hypocellular marrow (including marrow failure disorders NOS, aplastic anemia) | 118   | 15.0 |
| Isolated anemia (including vitamin deficiency, GI bleeds, general blood loss) | 79    | 10.0 |
| Reactive marrow                                                               | 71    | 9.0  |
| Nondiagnosics with cytopenias                                                 | 70    | 8.9  |
| Clonal lymphoid process (including CLL, other NHL, LGL)                       | 57    | 7.2  |
| Hypercellular marrow                                                          | 44    | 5.6  |
| Systemic disease (including autoimmune disorders and renal disease)           | 33    | 4.2  |
| Plasma cell neoplasm                                                          | 33    | 4.2  |
| Carcinoma                                                                     | 1     | 0.1  |

CLL = chronic lymphocytic leukemia; GI = gastrointestinal; LGL = large granular lymphocytes; NHL = Non-Hodgkin's Lymphoma; NOS = Not Otherwise Specified

**Table S3. Revised International Prognostic Scoring System (IPSS-R) score distribution for all study participants.**

|                | <b>N = 918</b> |          |
|----------------|----------------|----------|
| <b>IPSS-R</b>  | <b>N</b>       | <b>%</b> |
| Very Low       | 268            | 29.2     |
| Low            | 191            | 20.8     |
| Intermediate   | 76             | 8.28     |
| High           | 42             | 4.58     |
| Very High      | 52             | 5.66     |
| Not Calculated | 289            | 31.5     |

Score categorization: Very Low:  $\leq 1.5$ ; Low:  $>1.5 - 3$ ;  
Intermediate:  $>3 - 4.5$ ; High:  $>4.5 - 6$ ; Very High:  $>6$

Table S4. Contingency table of validated local diagnosis and final study diagnosis for patients with local genetics available at diagnosis.

| Validated Local Diagnosis | Final Study Diagnosis |          |           |                 |           |           |                  | Total                   |
|---------------------------|-----------------------|----------|-----------|-----------------|-----------|-----------|------------------|-------------------------|
|                           | AML<30% blasts*       | ICUS     | MDS       | MDS/MPN overlap | Other     | Other AML | Other Malignancy |                         |
| AML<30%                   | 0                     | 0        | 0         | 0               | 0         | 0         | 0                | 0                       |
| ICUS                      | 0                     | 3        | 1         | 0               | 1         | 0         | 0                | 5                       |
| MDS                       | 0                     | 1        | 31        | 5               | 1         | 0         | 0                | 38                      |
| MDS/MPN overlap           | 0                     | 0        | 1         | 4               | 0         | 0         | 1                | 6                       |
| Other                     | 0                     | 0        | 5         | 0               | 20        | 0         | 0                | 25                      |
| Other AML                 | 0                     | 0        | 0         | 0               | 0         | 8         | 0                | 8                       |
| Other Malignancy          | 0                     | 0        | 1         | 0               | 0         | 0         | 5                | 6                       |
| <b>Total</b>              | <b>0</b>              | <b>4</b> | <b>39</b> | <b>9</b>        | <b>22</b> | <b>8</b>  | <b>6</b>         | <b>88</b>               |
| <b>Agreement rate</b>     | -                     | 75%      | 79%       | 44%             | 91%       | 100%      | 83%              | <b>81%</b>              |
| <b>Kappa (95% CI)</b>     |                       |          |           |                 |           |           |                  | <b>0.73 (0.61-0.85)</b> |

The number of participants assigned to each disease group cross-classified by assignment source is reported in this table, along with the agreement rates and kappa statistic. Agreement rates reflect the proportion of participants in each final study diagnosis category (MDS subtype) that had a matching validated local diagnosis. \*AML with <30% blasts without core binding factor or acute promyelocytic leukemia.

Table S5. Contingency table of validated local diagnosis and final study diagnosis for patients without local genetics available at diagnosis.

| Validated Local Diagnosis | Final Study Diagnosis |           |            |                 |            |           |                  | Total                   |
|---------------------------|-----------------------|-----------|------------|-----------------|------------|-----------|------------------|-------------------------|
|                           | AML<30% blasts*       | ICUS      | MDS        | MDS/MPN overlap | Other      | Other AML | Other Malignancy |                         |
| AML<30%                   | 12                    | 0         | 0          | 0               | 0          | 0         | 0                | 12                      |
| ICUS                      | 0                     | 28        | 7          | 2               | 11         | 0         | 3                | 51                      |
| MDS                       | 2                     | 7         | 178        | 5               | 21         | 1         | 3                | 217                     |
| MDS/MPN overlap           | 0                     | 0         | 1          | 24              | 0          | 0         | 2                | 27                      |
| Other                     | 0                     | 9         | 36         | 5               | 358        | 0         | 4                | 412                     |
| Other AML                 | 1                     | 0         | 4          | 0               | 0          | 29        | 0                | 34                      |
| Other Malignancy          | 0                     | 1         | 1          | 0               | 0          | 0         | 75               | 77                      |
| <b>Total</b>              | <b>15</b>             | <b>45</b> | <b>227</b> | <b>36</b>       | <b>390</b> | <b>30</b> | <b>87</b>        | <b>830</b>              |
| <b>Agreement rate</b>     | 80%                   | 62%       | 78%        | 67%             | 92%        | 97%       | 86%              | <b>85%</b>              |
| <b>Kappa (95% CI)</b>     |                       |           |            |                 |            |           |                  | <b>0.78 (0.74-0.81)</b> |

The number of participants assigned to each disease group cross-classified by assignment source is reported in this table, along with the agreement rates and kappa statistic. Agreement rates reflect the proportion of participants in each final study diagnosis category (MDS subtype) that had a matching validated local diagnosis. \*AML with <30% blasts without core binding factor or acute promyelocytic leukemia.

**Table S6. Contingency table of validated local diagnosis and final study diagnosis by MDS subclass.**

| Validated Local Diagnosis   | Final Study Diagnosis |            |            |            |            |            |            | MDS Isolated del(5q) | Total                   |
|-----------------------------|-----------------------|------------|------------|------------|------------|------------|------------|----------------------|-------------------------|
|                             | MDS-EB1               | MDS-EB2    | MDS-MLD    | MDS-RSMLD  | MDS-RSSLD  | MDS-SLD    | MDS-U      |                      |                         |
| <b>MDS-EB1</b>              | 36                    | 3          | 1          | 1          | 0          | 0          | 0          | 0                    | <b>41</b>               |
| <b>MDS-EB2</b>              | 1                     | 29         | 0          | 1          | 0          | 0          | 0          | 0                    | <b>31</b>               |
| <b>MDS-MLD</b>              | 3                     | 0          | 33         | 4          | 1          | 1          | 0          | 0                    | <b>42</b>               |
| <b>MDS-RSMLD</b>            | 2                     | 1          | 2          | 20         | 3          | 0          | 0          | 0                    | <b>28</b>               |
| <b>MDS-RSSLD</b>            | 0                     | 0          | 0          | 5          | 10         | 1          | 0          | 0                    | <b>16</b>               |
| <b>MDS-SLD</b>              | 0                     | 0          | 9          | 0          | 0          | 3          | 1          | 1                    | <b>14</b>               |
| <b>MDS-U</b>                | 3                     | 1          | 6          | 4          | 0          | 2          | 8          | 0                    | <b>24</b>               |
| <b>MDS Isolated del(5q)</b> | 2                     | 1          | 0          | 1          | 0          | 0          | 1          | 8                    | <b>13</b>               |
| <b>Total</b>                | <b>47</b>             | <b>35</b>  | <b>51</b>  | <b>36</b>  | <b>14</b>  | <b>7</b>   | <b>10</b>  | <b>9</b>             | <b>209</b>              |
| <b>Agreement rate</b>       | <b>77%</b>            | <b>83%</b> | <b>65%</b> | <b>56%</b> | <b>71%</b> | <b>43%</b> | <b>80%</b> | <b>89%</b>           | <b>70%</b>              |
| <b>Kappa (95% CI)</b>       |                       |            |            |            |            |            |            |                      | <b>0.65 (0.58-0.72)</b> |

Diagnosis of MDS was based on The World Health Organization (2016) Classification. Total represents the number of participants assigned to MDS for the given assignment source. Agreement rate reflects the proportion of participants in each final study diagnosis category (MDS subtype) that had a matching validated local diagnosis. MDS-SLD = MDS with single lineage dysplasia; MDS-RSSLD = MDS with ring sideroblasts and single lineage dysplasia; MDS-MLD = MDS with multilineage dysplasia; MDS-RSMLD = MDS with ring sideroblasts and multi-lineage dysplasia; MDS-EB1 = MDS with excess blasts 1 (PB: 2-4%, BM: 5-9% blasts); MDS-EB2 = MDS with excess blasts 2 (PB: 5-10%, BM: 10-19% blasts); MDS Isolated del(5q) = MDS with isolated del(5q); MDS-U = MDS, unclassifiable; Other = not classified as MDS.
